# Supplementary material for: Large-scale profiling of noncoding RNA function in yeast
Source: PubMed Central journal article supplement (PMC5864082; doi:10.1371/journal.pgen.1007253), 2018-03-12
Supplement: pgen.1007253.s010.pdf [file pgen.1007253.s010.pdf]

**S10 TABLE**

**HETEROZYGOTE COLLECTION** - Genes listed in order of most haploproficient or haploinsufficient from top left down each column to bottom right.

**C-limited 30°C Pool vs Batch top 50 haploproficient**

|                |           |               |                 |
|----------------|-----------|---------------|-----------------|
| SNR39B         | SNR190    | SUT367        | SUT571          |
| SNR70          | CUT007    | tG(GCC)G1     | tL(UAA)B2       |
| tD(GUC)I2      | SNR37     | SNR87         | tR(UCU)M1       |
| tE(CUC)D       | SUT346    | SUT142        | tR(UCU)J1       |
| SNR86          | tN(GUU)L  | tL(UAA)D      | SNR32           |
| tQ(UUG)D3      | SNR85     | tH(GUG)G2     | tL(CAA)M        |
| SUT014         | tE(UUC)K  | tG(GCC)D2     | tE(UUC)M        |
| SNR56          | tQ(UUG)E2 | CUT213        | SUT193          |
| SUT042         | tN(GUU)F  | SNR46         | tL(CAA)G2 SUP54 |
| SNR65          | tQ(UUG)C  | tE(UUC)G2     | tE(UUC)K SOE1   |
| SUT055         | SNR80     | tG(CCC)D SUF3 | tl(AAU)N2       |
| tQ(CUG)M CDC65 | SUT085    | tQ(UUG)E1     |                 |
| tC(GCA)G       | SNR63     | SUT518        |                 |

**C-limited 36°C Pool vs Batch top 50 haploproficient**

|          |           |                |                 |
|----------|-----------|----------------|-----------------|
| CUT060   | tD(GUC)I2 | tC(GCA)G       | tL(UAA)D        |
| SUT010   | SNR190    | tR(UCU)M1      | tN(GUU)L        |
| CUT248   | tE(CUC)D  | tQ(CUG)M CDC65 | tL(CAA)G2 SUP54 |
| SNR39B   | SUT346    | tD(GUC)I1      | SNR80           |
| SUT042   | SUT014    | SUT518         | SUT571          |
| CUT007   | tQ(UUG)E2 | SUT367         | tl(AAU)P1       |
| SNR70    | SNR65     | SNR51/70/41    | CUT213          |
| SNR86    | tQ(UUG)D3 | SUT193         | SUT289/717      |
| SNR56    | SUT055    | SNR32          | tH(GUG)H        |
| tX(XXX)D | SUT085    | SNR87          | tL(CAA)D        |
| SUT087   | SNR63     | SUT142         | SUT477          |
| SUT019   | tE(UUC)I  | tL(CAA)N       |                 |
| SNR85    | SNR40     | tE(UUC)K       |                 |

**C-limited 30°C 100mM LiCl Pool vs Batch top 50 haploproficient**

|                |                |               |               |
|----------------|----------------|---------------|---------------|
| tT(AGU)J       | tQ(CUG)M CDC65 | SNR51/70/41   | tE(UUC)E1     |
| SUT348         | SUT193         | tC(GCA)G      | tV(UAC)D      |
| tG(GCC)G2      | SNR86          | tE(UUC)K      | tQ(UUG)C      |
| tP(UGG)A TRN1  | SNR65          | tN(GUU)F      | tR(UCU)M1     |
| CUT873         | SNR56          | tP(UGG)O1     | tH(GUG)G2     |
| tY(GUA)J2 SUP4 | SNR70          | tP(UGG)N1     | tT(CGU)K TRT2 |
| tG(GCC)P1      | tE(CUC)D       | SUT414        | SUT142        |
| tD(GUC)I2      | SNR87          | SUT346        | tD(GUC)J2     |
| CUT060         | tW(CCA)J       | SUT469        | SNR62         |
| SNR37          | SUT042         | SNR39B        | tL(CAA)G1     |
| tV(AAC)G3      | SUT085         | tG(UCC)O SUF1 | tS(GCU)F      |
| tN(GUU)O2      | SUT055         | SNR80         |               |
| CUT213         | SUT087         | SNR190        |               |

**N-limited 30°C Pool vs Batch top 50 haploproficient**

|             |           |                |          |
|-------------|-----------|----------------|----------|
| CUT248      | SNR37     | CUT060         | tE(UUC)K |
| SNR41       | tE(CUC)D  | SNR65          | tC(GCA)G |
| SUT010      | SNR86     | tP(UGG)F SUF9  | SNR63    |
| SUT019      | SUT014    | SNR190         | CUT213   |
| tA(UGC)A    | SNR56     | tT(UGU)G1      | SUT367   |
| SUT001      | SNR70     | SUT098         | SNR32    |
| SUT087      | tQ(UUG)D3 | SUT346         | SNR128   |
| SNR35       | tQ(UUG)E2 | SUT085         | SUT193   |
| SUT170      | SUT643    | tQ(CUG)M CDC65 | tS(GCU)F |
| SNR78       | CUT007    | tL(GAG)G       | SNR81    |
| SNR51/70/41 | SUT042    | SUT340         | SNR46    |
| SNR39B      | SNR85     | SNR40          |          |
| SUT089      | tD(GUC)I2 | SUT055         |          |

**N-limited 36°C Pool vs Batch top 50 haploproficient**

|           |                |           |            |
|-----------|----------------|-----------|------------|
| CUT060    | SNR85          | SNR63     | SNR62      |
| SUT087    | tN(GUU)O2      | tQ(UUG)E2 | tE(UUC)K   |
| SUT010    | SNR39B         | tP(UGG)O1 | SUT289/717 |
| SUT042    | SNR87          | SUT367    | SUT142     |
| CUT248    | SUT019         | tG(GCC)P1 | tR(UCU)M1  |
| tD(GUC)I2 | SUT346         | tD(GUC)I1 | SUT518     |
| SNR65     | SUT085         | SNR45     | CUT213     |
| SNR70     | SNR190         | CUT873    | SNR40      |
| SNR86     | tQ(CUG)M CDC65 | SUT441    | SNR46      |
| tD(GUC)K  | SNR51/70/41    | tC(GCA)G  | tE(UUC)I   |
| tE(CUC)D  | SUT348         | SNR32     | SUT285     |
| SNR56     | tQ(UUG)D3      | tL(UAA)D  |            |
| tX(XXX)D  | SUT055         | SUT354    |            |

**N-limited 100mM LiCl 30°C Pool vs Batch top 50 haploproficient**

|          |               |             |                |
|----------|---------------|-------------|----------------|
| CUT248   | SNR86         | CUT060      | tQ(CUG)M CDC65 |
| SNR41    | SNR190        | SUT042      | SNR63          |
| SUT010   | SNR85         | SNR51/70/41 | tL(GAG)G       |
| SUT001   | SUT170        | SUT340      | tE(UUC)K       |
| SUT019   | SNR70         | SNR65       | CUT007         |
| tA(UGC)A | tD(GUC)I2     | SUT367      | tC(GCA)G       |
| SNR43    | tQ(UUG)D3     | SUT055      | tH(GUG)G2      |
| SUT087   | SNR56         | CUT816      | SNR81          |
| SNR35    | SUT014        | SUT085      | tD(GUC)I1      |
| SNR39B   | SUT643        | SUT346      | SNR46          |
| SNR78    | tQ(UUG)E2     | SNR32       | SNR128         |
| SNR37    | tP(UGG)F SUF9 | SUT098      |                |
| tE(CUC)D | tT(UGU)G1     | SNR40       |                |

**C-limited 30°C Pool vs Batch top 50 haploinsufficient**

|               |                |                |           |
|---------------|----------------|----------------|-----------|
| tR(CCU)J HSX1 | tT(AGU)D       | SUT285         | tH(GUG)E2 |
| tF(GAA)B      | CUT356         | tK(CUU)G1      | SNR83     |
| SUT167        | SUT125         | SUT617         | tE(CUC)I  |
| tK(CUU)G3     | tV(AAC)O       | tS(AGA)J       | tD(GUC)N  |
| SUT211        | U4 snRNA SNR14 | CUT572         | CUT005    |
| tD(GUC)J1     | tR(CCG)L TRR4  | tP(UGG)A TRN1  | SUT463    |
| tV(CAC)D      | SUT543/115     | SNR64          | SNR53     |
| tV(UAC)D      | tA(UGC)O       | tR(UCU)B       | SUT591    |
| SNR48         | U2 snRNA snR20 | CUT378         | tL(CAA)L  |
| CUT547        | LSR1           | tG(GCC)D1      | CUT150    |
| CUT827        | SUT004         | tG(GCC)C SUF16 | SNR45     |
| tR(UCU)E      | CUT523         | SUT056         | CUT442    |
| SUT509        | SUT480         | tD(GUC)M       |           |

**C-limited 36°C Pool vs Batch top 50 haploinsufficient**

|               |          |                |                |
|---------------|----------|----------------|----------------|
| tR(CCU)J HSX1 | tA(AGC)D | tV(AAC)G1      | U2 snRNA snR20 |
| tA(UGC)O      | tA(UGC)L | CUT374         | LSR1           |
| CUT547        | tS(AGA)M | CUT005         | tR(UCU)G1      |
| SUT167        | SUT617   | CUT572         | tT(AGU)H       |
| tV(CAC)D      | tE(UUC)P | tS(AGA)J       | tD(GUC)M       |
| SUT233/CUT707 | tT(AGU)D | SUT218/655     | SUT004         |
| tF(GAA)B      | tR(UCU)E | tV(AAC)O       | tR(UCU)B       |
| tK(CUU)G3     | SUT340   | tD(GUC)N       | CUT634         |
| SUT456/029    | SUT509   | SNR61          | tQ(UUG)D1      |
| tV(AAC)K1     | CUT356   | CUT827         | tG(GCC)J1      |
| SUT211        | SUT119   | U4 snRNA SNR14 | SNR64          |
| tD(GUC)J1     | tW(CCA)P | SUT125         | tT(AGU)O2      |
| tV(UAC)D      | SNR48    | SUT480         |                |

**C-limited 30°C 100mM LiCl Pool vs Batch top 50 haploinsufficient**

|                |                |                |               |
|----------------|----------------|----------------|---------------|
| tR(CCU)J HSX1  | tD(GUC)M       | CUT356         | tR(UCU)B      |
| tK(CUU)G3      | tR(UCU)E       | tK(CUU)G1      | CUT277        |
| SNR13          | tH(GUG)E2      | tN(GUU)K       | SUT004        |
| tQ(UUG)L       | SNR64          | tT(AGU)D       | SUT084/SUT499 |
| U2 snRNA snR20 | SNR83          | SUT824         | CUT461        |
| LSR1           | SUT463         | U4 snRNA SNR14 | tD(GUC)J1     |
| tV(CAC)D       | tG(GCC)C SUF16 | SUT471         | SNR47         |
| CUT150         | tL(CAA)L       | SUT167         | tW(CCA)M      |
| tA(AGC)P       | SUT457         | U1 snRNA SNR19 | tQ(UUG)D2     |
| tG(GCC)D1      | tK(UUU)O       | tF(GAA)B       | SUT083        |
| tR(CCG)L TRR4  | CUT523         | tV(AAC)O       | SUT770        |
| SNR48          | CUT005         | SUT509         | SUT543/115    |
| tE(CUC)I       | SUT480         | SUT617         |               |

**N-limited 30°C Pool vs Batch top 50 haploinsufficient**

|               |                |                |                |
|---------------|----------------|----------------|----------------|
| tR(CCU)J HSX1 | tG(GCC)F2      | tG(GCC)C SUF16 | SUT456/029     |
| SUT233/CUT707 | tA(UGC)L       | SUT218/655     | tA(AGC)M2      |
| tV(CAC)D      | tT(AGU)D       | SUT125         | U4 snRNA SNR14 |
| tW(CCA)P      | CUT356         | tA(AGC)D       | tS(AGA)J       |
| SUT004        | SUT617         | CUT005         | tT(AGU)O2      |
| SUT167        | tV(UAC)D       | tD(GUC)M       | tT(CGU)K TRT2  |
| tI(AAU)E2     | tF(GAA)B       | SUT480         | SUT119         |
| tR(UCU)E      | U2 snRNA snR20 | tH(GUG)E2      | SNR83          |
| tV(AAC)G1     | LSR1           | tT(AGU)H       | tR(ACG)L       |
| tK(CUU)G3     | tD(GUC)J1      | tA(UGC)O       | tL(CAA)L       |
| tV(AAC)O      | SNR64          | tK(CUU)C       | tK(CUU)G1      |
| SUT211        | tR(CCG)L TRR4  | SUT737/313     | tK(UUU)O       |
| SNR48         | CUT547         | tG(GCC)D1      |                |

**N-limited 36°C Pool vs Batch top 50 haploinsufficient**

|               |                |                |                |
|---------------|----------------|----------------|----------------|
| tR(CCU)J HSX1 | SUT340         | SNR83          | tL(CAA)L       |
| tA(UGC)O      | tA(AGC)P       | SNR48          | tT(AGU)H       |
| SUT233/CUT707 | tD(GUC)M       | SUT480         | tT(AGU)O2      |
| SUT456/029    | SUT617         | SNR64          | tR(UCU)B       |
| CUT005        | SUT119         | tK(CUU)G3      | tE(CUC)I       |
| tR(UCU)E      | tW(CCA)P       | tV(AAC)M1      | SUT167         |
| tS(AGA)M      | tH(GUG)E2      | CUT374         | SUT218/655     |
| tA(AGC)D      | tG(GCC)D1      | tR(UCU)G1      | tV(AAC)O       |
| tA(UGC)L      | tE(UUC)P       | U2 snRNA snR20 | CUT523         |
| tV(CAC)D      | tD(GUC)N       | LSR1           | tG(GCC)J1      |
| CUT356        | tV(AAC)G1      | SNR61          | U4 snRNA SNR14 |
| tV(AAC)K1     | tG(GCC)C SUF16 | tT(AGU)D       | tK(CUU)G1      |
| tQ(UUG)L      | SUT125         | SUT463         |                |

**N-limited 30°C 100mM LiCl Pool vs Batch top 50 haploinsufficient**

|               |                |                |           |
|---------------|----------------|----------------|-----------|
| tR(CCU)J HSX1 | tA(UGC)L       | tG(GCC)C SUF16 | tT(AGU)O2 |
| tV(CAC)D      | tV(AAC)O       | SNR64          | SNR53     |
| tI(AAU)E2     | tV(AAC)G1      | tK(CUU)C       | tG(GCC)D1 |
| SUT233/CUT707 | U2 snRNA snR20 | SUT456/029     | SNR83     |
| tR(UCU)E      | LSR1           | tR(CCG)L TRR4  | CUT547    |
| tK(CUU)G3     | SUT218/655     | SUT125         | CUT523    |
| SUT004        | tF(GAA)B       | CUT005         | tS(AGA)A  |
| SUT167        | SNR48          | tH(GUG)E2      | tE(UUC)P  |
| tW(CCA)P      | tV(UAC)D       | SUT480         | tK(CUU)G1 |
| CUT356        | tT(AGU)D       | tA(AGC)M2      | tS(AGA)J  |
| tG(GCC)F2     | tA(AGC)D       | U4 snRNA SNR14 | SUT509    |
| SUT617        | tT(AGU)H       | SUT737/313     | tL(CAA)L  |
| SUT211        | tD(GUC)J1      | tD(GUC)M       |           |
