# Supplementary material for: Large-scale profiling of noncoding RNA function in yeast
Source: PubMed Central journal article supplement (PMC5864082; doi:10.1371/journal.pgen.1007253), 2018-03-12
Supplement: pgen.1007253.s011.pdf [file pgen.1007253.s011.pdf]

**S11 TABLE**

**HETEROZYGOTE COLLECTION** - Genes listed in order of most haploproficient or haploinsufficient from top left down each column to bottom right.

**C-limited 30°C ESS vs LSS top 50 haploproficient**

|           |            |                |                |
|-----------|------------|----------------|----------------|
| CUT332    | SNR53      | SNR58          | tE(UUC)E3      |
| SUT471    | tR(UCU)D   | tS(AGA)D3      | CUT296         |
| SUT089    | SUT643     | SUT229/661     | SUT170         |
| CUT827    | tQ(UUG)E2  | tX(XXX)D       | CUT645         |
| tA(AGC)F  | tV(AAC)O   | tD(GUC)N       | SNR62          |
| CUT002    | CUT356     | tG(GCC)J2      | ncRNA NME1     |
| tN(GUU)C  | CUT248     | tD(GUC)M       | SUT347         |
| tL(UAA)L  | SUT285     | U4 snRNA SNR14 | tY(GUA)J2 SUP4 |
| SNR60     | SUT824     | tW(CCA)M       | tP(UGG)H SUF8  |
| CUT170    | SUT602/176 | SUT437         | U6 snRNA SNR6  |
| SNR77     | CUT008     | tI(AAU)I2      | SUT496         |
| tK(UUU)K  | tT(AGU)J   | SNR50          |                |
| tV(AAC)G2 | tN(GUU)N1  | SUT274/698     |                |

**C-limited 36°C ESS vs LSS top 50 haploproficient**

|            |                |               |           |
|------------|----------------|---------------|-----------|
| SUT471     | tK(UUU)G2      | SNR17A        | SNR43     |
| tN(GUU)G   | tL(UAA)J SUP51 | U6 snRNA SNR6 | CUT572    |
| tA(AGC)G   | SUT019         | tC(GCA)P1     | tH(GUG)G2 |
| SUT354     | SUT167         | SNR45         | CUT356    |
| SNR53      | tV(AAC)M3      | tX(XXX)D      | SNR52     |
| tW(CCA)J   | SUT173         | SNR57         | tC(GCA)G  |
| SUT170     | tQ(UUG)D2      | SNR66         | tV(UAC)B  |
| tV(CAC)H   | tV(UAC)D       | SNR48         | tN(GUU)P  |
| SUT456/029 | tT(CGU)K TRT2  | SUT737/313    | tA(AGC)M2 |
| SUT056     | SUT089         | tS(AGA)D3     | tE(UUC)K  |
| tV(AAC)O   | tP(UGG)A TRN1  | SUT086/CUT102 | tI(UAU)L  |
| SUT035     | SUT492         | CUT213        |           |
| SUT518     | tL(UAA)L       | SUT284/712    |           |

**C-limited 30°C 100mM LiCl ESS vs LSS top 50 haploproficient**

|            |           |           |               |
|------------|-----------|-----------|---------------|
| tG(GCC)B   | tK(CUU)E2 | tQ(UUG)B  | SNR51/70/41   |
| tH(GUG)E2  | SNR72     | tT(AGU)I1 | SNR48         |
| tK(UUU)P   | SUT119    | tA(AGC)K2 | tT(UGU)G1     |
| SUT493     | SUT617    | tN(GUU)F  | SNR13         |
| CUT356     | SNR80     | tA(UGC)E  | CUT084/SUT068 |
| tR(ACG)D   | SUT355    | tA(UGC)G  | tR(CCU)J HSX1 |
| tG(GCC)M   | SUT123    | tG(GCC)F2 | CUT103        |
| tG(GCC)J1  | tC(GCA)B  | tK(CUU)I  | SNR53         |
| SUT218/655 | tI(AAU)L2 | SUT142    | SNR8          |
| SNR3       | CUT374    | tS(AGA)B  | SNR47         |
| CUT008     | tV(CAC)D  | tT(AGU)N1 | tI(AAU)E1     |
| tL(UAA)L   | tV(AAC)J  | tT(UGU)H  |               |
| tE(UUC)E3  | tI(AAU)N1 | SNR50     |               |

**N-limited 30°C ESS vs LSS top 50 haploproficient**

|                |               |           |               |
|----------------|---------------|-----------|---------------|
| CUT083         | tD(GUC)B      | tR(UCU)G1 | SNR48         |
| ty(GUA)M1 SUP5 | SUT014        | SUT518    | SUT119        |
| SUT056         | tV(AAC)K1     | SNR61     | tS(AGA)B      |
| SUT834         | SNR32         | SNR64     | tS(AGA)M      |
| SUT089         | tP(UGG)M SUF7 | SUT285    | SUT616        |
| tl(AAU)P2      | tV(CAC)D      | SNR30     | tR(CCU)J HSX1 |
| tP(UGG)L       | tT(AGU)I1     | SUT339    | tT(AGU)D      |
| CUT474         | CUT103        | tT(AGU)H  | tV(AAC)H      |
| tK(CUU)F       | SNR67         | SUT480    | SNR45         |
| tP(UGG)O3      | CUT001/437    | SUT004    | tG(GCC)O1     |
| SUT311         | SNR128        | SUT170    | tW(CCA)G1     |
| tT(UGU)G1      | SUT347        | SUT433    |               |
| SUT042         | SUT643        | SNR83     |               |

**N-limited 36°C ESS vs LSS top 50 haploproficient**

|           |                |           |               |
|-----------|----------------|-----------|---------------|
| tG(GCC)B  | tY(GUA)J2 SUP4 | SNR84     | tK(UUU)K      |
| SUT467    | CUT298/771     | tS(GCU)F  | SNR53         |
| tA(UGC)E  | tl(AAU)L1      | tD(GUC)N  | SUT493        |
| tG(GCC)M  | tT(CGU)K TRT2  | tE(UUC)G3 | tG(GCC)F2     |
| tH(GUG)E2 | CUT572         | tD(GUC)M  | SUT218/655    |
| tG(GCC)J1 | tT(AGU)O2      | SNR76     | SUT170        |
| SNR46     | tS(AGA)A       | tT(AGU)H  | SUT056        |
| tQ(UUG)D2 | tS(AGA)G       | CUT441    | SUT501        |
| tS(AGA)D1 | tR(ACG)D       | tV(UAC)B  | U6 snRNA SNR6 |
| tT(AGU)J  | tK(UUU)P       | SUT471    | SNR78         |
| tW(CCA)J  | SUT346         | SUT125    | SNR72         |
| tR(UCU)E  | tE(UUC)E3      | SNR128    |               |
| tW(CCA)G2 | CUT356         | SUT089    |               |

**N-limited 30°C 100mM LiCl ESS vs LSS top 50 haploproficient**

|               |                |               |               |
|---------------|----------------|---------------|---------------|
| SUT471        | tR(UCU)D       | tP(UGG)N1     | SUT239/679    |
| SUT098        | SUT267/697     | SUT125        | tG(GCC)O1     |
| tT(AGU)J      | SUT842/425     | tT(CGU)K TRT2 | tE(UUC)K SOE1 |
| tE(UUC)G3     | tl(AAU)L1      | SUT056        | U6 snRNA SNR6 |
| SNR128        | tD(GUC)D       | CUT873        | tA(AGC)K2     |
| SNR61         | SNR41          | SUT271        | SNR57         |
| CUT458        | tW(CCA)G1      | SUT493        | SUT456/029    |
| SNR48         | SUT107         | tW(CCA)J      | tT(UGU)G1     |
| tP(UGG)A TRN1 | SUT123         | CUT213        | tl(UAU)D      |
| SNR53         | SUT019         | tN(GUU)F      | SUT014        |
| tV(UAC)D      | tY(GUA)J2 SUP4 | tF(GAA)B      | tK(UUU)G2     |
| SUT170        | SNR51/70/41    | SNR39B        |               |
| SUT087        | SNR58          | SUT171        |               |

**C-limited 30°C ESS vs LSS top 50 haploinsufficient**

|            |               |                 |               |
|------------|---------------|-----------------|---------------|
| SUT107     | tP(UGG)A TRN1 | SNR39B          | tV(AAC)M2     |
| tQ(UUG)L   | SNR85         | SUT414          | SNR9          |
| SNR34      | tE(UUC)J      | tG(GCC)O1       | SUT571        |
| tA(AGC)P   | SUT085        | SUT067          | tR(CCG)L TRR4 |
| SUT591     | SUT500        | CUT873          | tI(AAU)P2     |
| tK(CUU)G1  | SUT593        | tL(UAG)L1       | tG(GCC)G2     |
| tD(GUC)K   | SUT348        | SUT014          | SUT441        |
| SNR13      | SNR190        | SUT267/697      | tL(CAA)N      |
| SUT361     | tD(GUC)J2     | SUT019          | SNR70         |
| SUT083     | tL(UAA)K      | tY(GUA)F2 SUP6  | tH(GUG)K      |
| tK(CUU)K   | CUT123        | tL(CAA)G2 SUP54 | tV(AAC)J      |
| SUT098     | SUT142        | tI(AAU)G        |               |
| SUT157/579 | tE(UUC)E1     | SUT042          |               |

**C-limited 36°C ESS vs LSS top 50 haploinsufficient**

|            |           |                |                |
|------------|-----------|----------------|----------------|
| SUT107     | tN(GUU)C  | CUT436         | SNR85          |
| SUT496     | CUT007    | tA(AGC)L       | U1 snRNA SNR19 |
| SUT457     | SUT348    | SUT539         | tG(UCC)G SUF4  |
| CUT150     | tL(UAA)K  | SUT071/483     | SUT085         |
| SNR13      | tG(GCC)D1 | tR(CCG)L TRR4  | tE(UUC)E1      |
| SNR190     | SUT500    | SUT463         | tV(AAC)G2      |
| tV(AAC)M2  | CUT523    | CUT008         | tD(GUC)I1      |
| tQ(UUG)L   | tA(AGC)P  | tA(AGC)F       | tH(GUG)K       |
| tD(GUC)M   | tW(CCA)M  | SUT264         | tL(UAG)L2      |
| tK(CUU)K   | SNR72     | tY(GUA)J1 SUP7 | CUT123         |
| tK(UUU)O   | tH(GUG)E2 | tV(AAC)J       | SNR41          |
| SUT602/176 | SUT067    | tD(GUC)J1      |                |
| tG(GCC)G2  | tL(UAG)L1 | tI(AAU)I1      |                |

**C-limited 30°C 100mM LiCl ESS vs LSS top 50 haploinsufficient**

|               |                |               |                |
|---------------|----------------|---------------|----------------|
| tV(AAC)G3     | CUT873         | tA(AGC)G      | SNR45          |
| tV(UAC)D      | SUT285         | tS(AGA)E      | tE(UUC)I       |
| SNR76         | tR(UCU)M1      | SNR78         | tQ(CUG)M CDC65 |
| SUT581        | tQ(UUG)L       | SUT414        | tS(AGA)D1      |
| tD(GUC)K      | tG(GCC)C SUF16 | SUT469        | tD(GUC)O       |
| SUT193        | SNR17A         | SUT830        | CUT248         |
| tQ(UUG)D2     | SNR32          | tF(GAA)B      | CUT217         |
| SNR87         | tN(GUU)O2      | tG(CCC)D SUF3 | tE(UUC)E1      |
| tP(UGG)A TRN1 | SNR42          | tQ(UUG)E2     | SNR73          |
| SUT211        | tE(UUC)K       | SNR9          | SNR161         |
| tE(UUC)C      | tE(CUC)D       | SUT010        | SUT289/717     |
| tG(GCC)P1     | SUT085         | CUT244        |                |
| SUT348        | tG(GCC)G2      | SNR64         |                |

**N-limited 30°C ESS vs LSS top 50 haploinsufficient**

|            |            |               |               |
|------------|------------|---------------|---------------|
| tG(GCC)D2  | tG(GCC)G1  | SUT099        | SUT725        |
| tE(UUC)M   | tS(AGA)E   | tK(CUU)P      | tT(AGU)B      |
| tW(CCA)G2  | CUT465     | CUT315        | SUT501        |
| tL(UAA)D   | SUT451     | tH(GUG)G2     | tI(AAU)P1     |
| SUT157/579 | ncRNA NME1 | tE(UUC)J      | SNR9          |
| tI(AAU)N1  | tV(AAC)K2  | SNR17B        | SUT129        |
| SNR34      | tD(GUC)I2  | tL(UAA)N      | tK(UUU)D      |
| tE(CUC)D   | SUT058     | CUT468        | tL(UAA)K      |
| SUT289/717 | SUT827     | tF(GAA)H1     | CUT775/SUT307 |
| SUT532     | tE(UUC)B   | tL(CAA)K      | tK(CUU)G1     |
| tS(AGA)H   | tH(GUG)M   | SUT571        | tR(ACG)E      |
| SNR69      | tG(GCC)P1  | tY(GUA)O SUP3 |               |
| tV(AAC)E1  | SUT430     | ncRNA TLC1    |               |

**N-limited 36°C ESS vs LSS top 50 haploinsufficient**

|                |               |           |                |
|----------------|---------------|-----------|----------------|
| CUT827         | CUT666        | tL(CAA)K  | SNR9           |
| SNR45          | SUT532        | SNR56     | SUT477         |
| SUT414         | tV(UAC)D      | SUT067    | tN(GUU)O1      |
| SNR17A         | tN(GUU)C      | tI(AAU)P1 | SUT413         |
| U1 snRNA SNR19 | SUT058        | CUT379    | tK(UUU)O       |
| SUT420/CUT425  | SNR4          | tI(AAU)B  | CUT775/SUT307  |
| tA(AGC)L       | tL(UAG)L1     | SUT722    | SNR55          |
| SUT764         | SUT107        | tL(UAA)D  | tY(GUA)M1 SUP5 |
| SNR30          | tY(GUA)D SUP2 | tR(ACG)K  | tP(UGG)A TRN1  |
| tD(GUC)J1      | SUT431        | tK(UUU)D  | SUT725         |
| SUT007         | SUT285        | SNR190    | SNR17B         |
| SUT167         | CUT764        | tF(GAA)N  |                |
| tK(CUU)D1      | SUT398        | SNR36     |                |

**N-limited 30°C 100mM LiCl ESS vs LSS top 50 haploinsufficient**

|            |            |               |                         |
|------------|------------|---------------|-------------------------|
| SUT602/176 | SNR69      | tK(UUU)L      | tK(CUU)D2               |
| tD(GUC)K   | tF(GAA)H2  | CUT244        | SNR72/73/74/75/76/77/78 |
| tI(AAU)N1  | SUT593     | SUT540        | CUT468                  |
| tH(GUG)G1  | SNR9       | tL(UAA)D      | tE(UUC)J                |
| SUT289/717 | ncRNA TLC1 | SUT558        | SUT532                  |
| tS(AGA)D3  | ncRNA RPR1 | tK(CUU)D1     | SNR63                   |
| SUT764     | SUT441     | tT(UGU)H      | tG(GCC)F1 SUF20         |
| SNR85      | SNR4       | tD(GUC)M      | tY(GUA)J1 SUP7          |
| SUT157/579 | tQ(UUG)C   | SUT385        | SUT099                  |
| tH(GUG)H   | tD(GUC)G2  | SNR71         | SNR31                   |
| SUT827     | tR(ACG)E   | CUT084/SUT068 | tF(GAA)N                |
| SUT355     | tH(GUG)M   | tC(GCA)B      |                         |
| SUT543/115 | tR(ACG)J   | CUT001/437    |                         |
