# Supplementary material for: Large-scale profiling of noncoding RNA function in yeast
Source: PubMed Central journal article supplement (PMC5864082; doi:10.1371/journal.pgen.1007253), 2018-03-12
Supplement: pgen.1007253.s013.pdf [file pgen.1007253.s013.pdf]

## S13 TABLE

### HETEROZYGOTE COLLECTION - Genes listed according to co-fitness groupings

#### Group 1 (149)

|                         |                    |                 |
|-------------------------|--------------------|-----------------|
| CUT005                  | SUT233/CUT707      | tI(AAU)B        |
| CUT008                  | SUT259/691         | tI(AAU)I1       |
| CUT103                  | SUT289/717         | tI(AAU)I2       |
| CUT123                  | SUT305             | tI(UAU)D        |
| CUT296/SUT301           | SUT339             | tK(CUU)C        |
| CUT320                  | SUT346             | tK(CUU)D1       |
| CUT374                  | SUT347             | tK(CUU)G1       |
| CUT436                  | SUT375             | tK(CUU)I        |
| CUT441                  | SUT385             | tK(CUU)M        |
| CUT523                  | SUT418             | tK(CUU)P        |
| CUT672                  | SUT457             | tK(UUU)K        |
| CUT775/SUT307           | SUT463             | tL(CAA)C SUP53  |
| ncRNA RUF21             | SUT465             | tL(GAG)G        |
| ncRNA TLC1              | SUT469             | tL(UAG)L1       |
| SNR17A                  | SUT480             | tM(CAU)C        |
| SNR17B                  | SUT493             | tN(GUU)C        |
| SNR31                   | SUT515             | tN(GUU)P        |
| SNR34                   | SUT518             | tP(UGG)M SUF7   |
| SNR35                   | SUT532             | tP(UGG)O3       |
| SNR42                   | SUT553             | tQ(UUG)D2       |
| SNR43                   | SUT570             | tR(ACG)K        |
| SNR48                   | SUT643             | tR(ACG)L        |
| SNR5                    | SUT729/CUT773      | tR(CCU)J (HSX1) |
| SNR53                   | SUT737/313         | tR(UCU)B        |
| SNR53/67                | SUT798/387         | tR(UCU)D        |
| SNR55                   | SUT827             | tS(AGA)D1       |
| SNR57                   | SUT830             | tS(AGA)D3       |
| SNR61                   | tA(AGC)G, tA(AGC)J | tS(AGA)G        |
| SNR69                   | tA(AGC)K1          | tS(AGA)J        |
| SNR70                   | tA(AGC)K2          | tS(GCU)F        |
| SNR72/73/74/75/76/77/78 | tA(AGC)M1          | tT(AGU)B        |
| SNR79                   | tA(AGC)M2          | tT(AGU)H        |
| SNR8                    | tA(UGC)G           | tT(AGU)I2       |
| SNR81                   | tA(UGC)L           | tT(AGU)N1       |
| SNR83                   | tA(UGC)O           | tT(AGU)N2       |
| SNR85                   | tD(GUC)D           | tV(AAC)G1       |
| SNR9                    | tD(GUC)G2          | tV(AAC)G3       |
| SUT001                  | tD(GUC)J4          | tV(AAC)K1       |
| SUT010                  | tD(GUC)N           | tV(AAC)L        |
| SUT055                  | tE(UUC)G1 (SOE1)   | tV(AAC)M2       |
| SUT087                  | tE(UUC)J           | tV(UAC)D        |
| SUT089                  | tE(UUC)M           | tW(CCA)G1       |
| SUT123                  | tF(GAA)P2          | tW(CCA)G2       |
| SUT125                  | tG(GCC)B           | tW(CCA)P        |
| SUT126                  | tG(GCC)E           | tY(GUA)J1 SUP7  |
| SUT157/579              | tG(GCC)F1 SUF20    | tY(GUA)M2 SUP8  |
| SUT170                  | tG(GCC)F2          | tY(GUA)O SUP3   |
| SUT171                  | tG(GCC)G1          | U2 snRNA (LSR1) |
| SUT211                  | tG(GCC)J1          |                 |
| SUT218/655              | tG(GCC)O2 (SUF17)  |                 |

**Cluster 2 (65)**

|               |                  |                  |
|---------------|------------------|------------------|
| CUT002        | SUT167           | tG(GCC)D2        |
| CUT083        | SUT219/656       | tH(GUG)E1        |
| CUT150        | SUT274/698       | tH(GUG)E2        |
| CUT332        | SUT284/712       | tH(GUG)M         |
| CUT356        | SUT367           | tK(CUU)G3        |
| CUT442        | SUT388           | tK(UUU)G1        |
| CUT461        | SUT471           | tK(UUU)O         |
| CUT547        | SUT509           | tL(CAA)K         |
| CUT645        | SUT543/115       | tL(CAA)L         |
| CUT827        | SUT725           | tL(UAA)L         |
| SNR10         | SUT834           | tN(GUU)N1        |
| SNR128        | tA(AGC)D         | tQ(UUG)L         |
| SNR128/SNR190 | tD(GUC)B         | tR(UCU)K         |
| SNR37         | tD(GUC)I2        | tS(AGA)L         |
| SNR4          | tD(GUC)J1        | tT(AGU)D         |
| SNR47         | tD(GUC)M         | tV(AAC)H         |
| SNR51         | tE(CUC)I         | tV(AAC)O         |
| SNR58         | tE(UUC)G2        | tV(CAC)D         |
| SNR64         | tE(UUC)P         | tV(UAC)B         |
| SNR87         | tF(GAA)B         | tW(CCA)M         |
| SUT004        | tG(GCC)C (SUF16) | tY(GUA)M1 (SUP5) |
| SUT098        | tG(GCC)D1        |                  |

**Cluster 3 (8)**

SUT239/679  
SUT431  
SUT492  
SUT718  
tP(UGG)F (SUF9)  
tT(AGU)O2  
tX(XXX)D  
tY(GUA)F1 (SUP11)

**Cluster 4 (4)**

CUT541/542/SUT503  
SUT437  
tL(CAA)N  
tP(UGG)O2 (SUF11)
