# Supplementary material for: Large-scale profiling of noncoding RNA function in yeast
Source: PubMed Central journal article supplement (PMC5864082; doi:10.1371/journal.pgen.1007253), 2018-03-12
Supplement: pgen.1007253.s015.pdf [file pgen.1007253.s015.pdf]

## S15 TABLE

**HAPLOID COLLECTION** Genes listed in order of most haploproficient or haploinsufficient from top left down each column to bottom right.

### Top 50 haploproficient on YPD plates

|                 |            |             |            |
|-----------------|------------|-------------|------------|
| tD(GUC)J3       | tE(UUC)K   | tR(ACG)J    | SUT304/730 |
| tE(UUC)B        | tR(UCU)J2  | tL(UAA)N    | tl(AAU)B   |
| SNR75           | tD(GUC)M   | SNR47       | tD(GUC)G2  |
| tA(UGC)G        | tF(GAA)P1  | tV(AAC)M2   | CUT468     |
| SUT492          | SUT479     | SUT465      | SNR81      |
| SNR82           | SUT798/387 | SUT055      | CUT474     |
| SUT558          | tL(GAG)G   | tS(AGA)D2   | SNR83      |
| tF(GAA)N        | SUT471     | tR(ACG)D    | SUT842/425 |
| tG(UCC)N (SUF6) | tT(AGU)N1  | tE(UUC)J    | tK(CUU)E2  |
| SUT129          | SUT388     | tD(GUC)L1   | tH(GUG)G1  |
| tD(GUC)J4       | tA(UGC)O   | SNR51/70/41 | tl(UAU)D   |
| tE(UUC)I        | tL(UAG)L2  | SUT722      |            |
| tV(AAC)J        | tN(GUU)N2  | SNR36       |            |

### Top 50 haploinsufficient on YPD plates

|                  |               |            |          |
|------------------|---------------|------------|----------|
| SUT233/CUT707    | SUT457        | tP(UGG)L   | SNR17A   |
| tl(CAA)A (SUP56) | tA(AGC)F      | CUT103     | SUT581   |
| SUT339           | CUT150        | tF(GAA)M   | CUT546   |
| CUT816           | SUT098        | CUT213/690 | SNR32    |
| tT(AGU)N2        | SUT493        | CUT356     | SUT014   |
| CUT002           | SUT361        | tD(GUC)G1  | SNR3     |
| tl(AAU)L1        | SUT347        | tD(GUC)J1  | SUT042   |
| tV(AAC)M3        | SUT086/CUT102 | SNR61      | tT(AGU)C |
| tV(AAC)G3        | SUT725        | tV(AAC)O   | SUT035   |
| SUT173           | SNR10         | SUT174     | CUT296   |
| tA(AGC)J         | tG(GCC)G2     | CUT436     | CUT782   |
| CUT102           | SNR33         | CUT424     |          |
| tD(GUC)L2        | CUT298/771    | SNR31      |          |
