# Supplementary material for: Large-scale profiling of noncoding RNA function in yeast
Source: PubMed Central journal article supplement (PMC5864082; doi:10.1371/journal.pgen.1007253), 2018-03-12
Supplement: pgen.1007253.s016.pdf [file pgen.1007253.s016.pdf]

S16 Table

| Heterozygous tRNA deletions this collection | Homozygous tRNA deletions this collection | Mat a tRNA deletions this collection | Mat $\alpha$ tRNA deletions this collection | Mat $\alpha$ tRNA deletions Bloom-Ackermann et al |
|---------------------------------------------|-------------------------------------------|--------------------------------------|---------------------------------------------|---------------------------------------------------|
|                                             |                                           |                                      |                                             | tA(AGC)D                                          |
| tA(AGC)F                                    | tA(AGC)F                                  | tA(AGC)F                             | tA(AGC)F                                    | tA(AGC)F                                          |
| tA(AGC)G                                    | tA(AGC)G                                  | tA(AGC)G                             | tA(AGC)G                                    | tA(AGC)G                                          |
| tA(AGC)H                                    | tA(AGC)H                                  | tA(AGC)H                             | tA(AGC)H                                    |                                                   |
| tA(AGC)J                                    | tA(AGC)J                                  |                                      | tA(AGC)J                                    |                                                   |
|                                             |                                           |                                      |                                             | tA(AGC)K1                                         |
| tA(AGC)K2                                   |                                           | tA(AGC)K2                            |                                             | tA(AGC)K2                                         |
| tA(AGC)L                                    |                                           |                                      | tA(AGC)L                                    | tA(AGC)L                                          |
| tA(AGC)M1                                   | tA(AGC)M1                                 |                                      | tA(AGC)M1                                   | tA(AGC)M1                                         |
| tA(AGC)M2                                   | tA(AGC)M2                                 | tA(AGC)M2                            | tA(AGC)M2                                   | tA(AGC)M2                                         |
| tA(AGC)P                                    |                                           |                                      |                                             |                                                   |
|                                             | tA(UGC)A                                  | tA(UGC)A                             | tA(UGC)A                                    | tA(UGC)A                                          |
| tA(UGC)E                                    |                                           | tA(UGC)E                             |                                             | tA(UGC)E                                          |
| tA(UGC)G                                    | tA(UGC)G                                  | tA(UGC)G                             | tA(UGC)G                                    | tA(UGC)G                                          |
| tA(UGC)L                                    | tA(UGC)L                                  | tA(UGC)L                             | tA(UGC)L                                    | tA(UGC)L                                          |
| tA(UGC)O                                    | tA(UGC)O                                  | tA(UGC)O                             | tA(UGC)O                                    |                                                   |
| tC(GCA)B                                    |                                           | tC(GCA)B                             |                                             | tC(GCA)B                                          |
| tC(GCA)G                                    |                                           | tC(GCA)G                             |                                             |                                                   |
| tC(GCA)P1                                   | tC(GCA)P1                                 | tC(GCA)P1                            | tC(GCA)P1                                   | tC(GCA)P1                                         |
| tC(GCA)P2                                   |                                           | tC(GCA)P2                            |                                             | tC(GCA)P2                                         |
| tD(GUC)B                                    |                                           |                                      | tD(GUC)B                                    |                                                   |
| tD(GUC)D                                    |                                           |                                      |                                             |                                                   |
|                                             | tD(GUC)G1                                 | tD(GUC)G1                            | tD(GUC)G1                                   | tD(GUC)G1                                         |
| tD(GUC)G2                                   | tD(GUC)G2                                 | tD(GUC)G2                            | tD(GUC)G2                                   | tD(GUC)G2                                         |
| tD(GUC)I1                                   | tD(GUC)I1                                 | tD(GUC)I1                            | tD(GUC)I1                                   |                                                   |
| tD(GUC)I2                                   | tD(GUC)I2                                 | tD(GUC)I2                            | tD(GUC)I2                                   |                                                   |
| tD(GUC)J1                                   | tD(GUC)J1                                 | tD(GUC)J1                            | tD(GUC)J1                                   |                                                   |
| tD(GUC)J2                                   |                                           | tD(GUC)J2                            | tD(GUC)J2                                   |                                                   |
| tD(GUC)J3                                   | tD(GUC)J3                                 | tD(GUC)J3                            | tD(GUC)J3                                   |                                                   |
| tD(GUC)J4                                   | tD(GUC)J4                                 | tD(GUC)J4                            | tD(GUC)J4                                   | tD(GUC)J4                                         |
| tD(GUC)K                                    | tD(GUC)K                                  |                                      |                                             | tD(GUC)K                                          |
| tD(GUC)L1                                   | tD(GUC)L1                                 | tD(GUC)L1                            | tD(GUC)L1                                   | tD(GUC)L1                                         |
| tD(GUC)L2                                   | tD(GUC)L2                                 | tD(GUC)L2                            | tD(GUC)L2                                   |                                                   |
| tD(GUC)M                                    | tD(GUC)M                                  | tD(GUC)M                             | tD(GUC)M                                    | tD(GUC)M                                          |
|                                             |                                           | tD(GUC)N                             |                                             |                                                   |
| tD(GUC)O                                    | tD(GUC)O                                  | tD(GUC)O                             | tD(GUC)O                                    | tD(GUC)O                                          |
| tE(CUC)D                                    | tE(CUC)D                                  | tE(CUC)D                             | tE(CUC)D                                    | tE(CUC)D                                          |
| tE(CUC)I                                    | tE(CUC)I                                  | tE(CUC)I                             | tE(CUC)I                                    | tE(CUC)I                                          |
| tE(UUC)B                                    | tE(UUC)B                                  | tE(UUC)B                             | tE(UUC)B                                    | tE(UUC)B                                          |
| tE(UUC)C                                    | tE(UUC)C                                  | tE(UUC)C                             |                                             | tE(UUC)C                                          |

|                 |                 |                 |                 |           |
|-----------------|-----------------|-----------------|-----------------|-----------|
| tE(UUC)E1       |                 | tE(UUC)E1       | tE(UUC)E1       | tE(UUC)E1 |
| tE(UUC)E2       | tE(UUC)E2       | tE(UUC)E2       | tE(UUC)E2       |           |
| tE(UUC)E3       |                 |                 | tE(UUC)E3       | tE(UUC)E3 |
| tE(UUC)G1 SOE1  | tE(UUC)G1 SOE1  | tE(UUC)G1 SOE1  | tE(UUC)G1 SOE1  | tE(UUC)G1 |
| tE(UUC)G2       |                 | tE(UUC)G2       | tE(UUC)G2       |           |
| tE(UUC)G3       | tE(UUC)G3       | tE(UUC)G3       | tE(UUC)G3       |           |
| tE(UUC)I        | tE(UUC)I        | tE(UUC)I        | tE(UUC)I        | tE(UUC)I  |
| tE(UUC)J        | tE(UUC)J        | tE(UUC)J        | tE(UUC)J        | tE(UUC)J  |
| tE(UUC)K        | tE(UUC)K        | tE(UUC)K        | tE(UUC)K        | tE(UUC)K  |
| tE(UUC)L        | tE(UUC)L        | tE(UUC)L        | tE(UUC)L        | tE(UUC)L  |
| tE(UUC)M        | tE(UUC)M        | tE(UUC)M        | tE(UUC)M        | tE(UUC)M  |
| tE(UUC)P        | tE(UUC)P        | tE(UUC)P        | tE(UUC)P        | tE(UUC)P  |
| tF(GAA)B        |                 |                 |                 |           |
| tF(GAA)D        | tF(GAA)D        | tF(GAA)D        | tF(GAA)D        | tF(GAA)D  |
| tF(GAA)F        | tF(GAA)F        | tF(GAA)F        | tF(GAA)F        | tF(GAA)F  |
| tF(GAA)G        | tF(GAA)G        | tF(GAA)G        | tF(GAA)G        | tF(GAA)G  |
| tF(GAA)H1       | tF(GAA)H1       | tF(GAA)H1       | tF(GAA)H1       | tF(GAA)H1 |
| tF(GAA)H2       | tF(GAA)H2       | tF(GAA)H2       | tF(GAA)H2       | tF(GAA)H2 |
| tF(GAA)M        | tF(GAA)M        | tF(GAA)M        | tF(GAA)M        | tF(GAA)M  |
| tF(GAA)N        | tF(GAA)N        | tF(GAA)N        | tF(GAA)N        | tF(GAA)N  |
| tF(GAA)P1       | tF(GAA)P1       | tF(GAA)P1       | tF(GAA)P1       | tF(GAA)P1 |
| tF(GAA)P2       | tF(GAA)P2       | tF(GAA)P2       | tF(GAA)P2       | tF(GAA)P2 |
| tG(CCC)D SUF3   | tG(CCC)D SUF3   | tG(CCC)D SUF3   | tG(CCC)D SUF3   | tG(CCC)D  |
| tG(CCC)O SUF5   | tG(CCC)O SUF5   | tG(CCC)O SUF5   | tG(CCC)O SUF5   | tG(CCC)O  |
| tG(GCC)B        |                 |                 |                 |           |
| tG(GCC)C SUF16  | tG(GCC)C SUF16  | tG(GCC)C SUF16  | tG(GCC)C SUF16  | tG(GCC)C  |
| tG(GCC)D1       | tG(GCC)D1       | tG(GCC)D1       | tG(GCC)D1       | tG(GCC)D1 |
| tG(GCC)D2       | tG(GCC)D2       | tG(GCC)D2       | tG(GCC)D2       |           |
| tG(GCC)E        | tG(GCC)E        | tG(GCC)E        | tG(GCC)E        | tG(GCC)E  |
| tG(GCC)F1 SUF20 | tG(GCC)F1 SUF20 | tG(GCC)F1 SUF20 | tG(GCC)F1 SUF20 | tG(GCC)F1 |
|                 |                 |                 |                 | tG(GCC)F2 |
| tG(GCC)G1       | tG(GCC)G1       | tG(GCC)G1       | tG(GCC)G1       | tG(GCC)G1 |
|                 |                 | tG(GCC)G2       | tG(GCC)G2       | tG(GCC)G2 |
| tG(GCC)J1       | tG(GCC)J1       | tG(GCC)J1       | tG(GCC)J1       | tG(GCC)J1 |
| tG(GCC)J2       |                 | tG(GCC)J2       | tG(GCC)J2       | tG(GCC)J2 |
|                 | tG(GCC)M        | tG(GCC)M        | tG(GCC)M        |           |
| tG(GCC)O1       |                 | tG(GCC)O1       |                 | tG(GCC)O1 |
| tG(GCC)O2 SUF17 | tG(GCC)O2 SUF17 | tG(GCC)O2 SUF17 |                 | tG(GCC)O2 |
| tG(GCC)P1       | tG(GCC)P1       | tG(GCC)P1       | tG(GCC)P1       | tG(GCC)P1 |
| tG(GCC)P2       | tG(GCC)P2       | tG(GCC)P2       | tG(GCC)P2       | tG(GCC)P2 |
| tG(UCC)G SUF4   | tG(UCC)G SUF4   | tG(UCC)G SUF4   | tG(UCC)G SUF4   | tG(UCC)G  |

|                |                |                |                |           |
|----------------|----------------|----------------|----------------|-----------|
| tG(UCC)N SUF6  | tG(UCC)N SUF6  | tG(UCC)N SUF6  | tG(UCC)N SUF6  | tG(UCC)N  |
| tG(UCC)O SUF1  |                |                | tG(UCC)O SUF1  | tG(UCC)O  |
| tH(GUG)E1      | tH(GUG)E1      | tH(GUG)E1      | tH(GUG)E1      |           |
| tH(GUG)E2      |                |                | tH(GUG)E2      | tH(GUG)E2 |
| tH(GUG)G1      | tH(GUG)G1      | tH(GUG)G1      | tH(GUG)G1      | tH(GUG)G1 |
| tH(GUG)G2      | tH(GUG)G2      | tH(GUG)G2      | tH(GUG)G2      | tH(GUG)G2 |
| tH(GUG)H       | tH(GUG)H       | tH(GUG)H       | tH(GUG)H       | tH(GUG)H  |
| tH(GUG)K       | tH(GUG)K       | tH(GUG)K       | tH(GUG)K       |           |
| tH(GUG)M       | tH(GUG)M       | tH(GUG)M       | tH(GUG)M       |           |
| tI(AAU)B       | tI(AAU)B       | tI(AAU)B       | tI(AAU)B       |           |
| tI(AAU)D       |                | tI(AAU)D       | tI(AAU)D       | tI(AAU)D  |
| tI(AAU)E1      | tI(AAU)E1      | tI(AAU)E1      | tI(AAU)E1      | tI(AAU)E1 |
|                |                | tI(AAU)E2      |                | tI(AAU)E2 |
| tI(AAU)G       | tI(AAU)G       | tI(AAU)G       | tI(AAU)G       | tI(AAU)G  |
| tI(AAU)I2      | tI(AAU)I2      | tI(AAU)I2      | tI(AAU)I2      |           |
| tI(AAU)L1      | tI(AAU)L1      | tI(AAU)L1      | tI(AAU)L1      | tI(AAU)L1 |
| tI(AAU)L2      | tI(AAU)L2      | tI(AAU)L2      | tI(AAU)L2      | tI(AAU)L2 |
| tI(AAU)N1      |                | tI(AAU)N1      |                | tI(AAU)N1 |
| tI(AAU)N2      |                |                | tI(AAU)N2      |           |
| tI(AAU)P1      | tI(AAU)P1      | tI(AAU)P1      | tI(AAU)P1      |           |
| tI(AAU)P2      | tI(AAU)P2      | tI(AAU)P2      | tI(AAU)P2      |           |
| tI(UAU)D       | tI(UAU)D       | tI(UAU)D       | tI(UAU)D       |           |
| tI(UAU)L       |                |                |                |           |
| tK(CUU)D1      | tK(CUU)D1      | tK(CUU)D1      | tK(CUU)D1      | tK(CUU)D1 |
| tK(CUU)D2      | tK(CUU)D2      | tK(CUU)D2      | tK(CUU)D2      |           |
| tK(CUU)E1      | tK(CUU)E1      | tK(CUU)E1      | tK(CUU)E1      | tK(CUU)E1 |
| tK(CUU)E2      | tK(CUU)E2      | tK(CUU)E2      | tK(CUU)E2      | tK(CUU)E2 |
| tK(CUU)F       | tK(CUU)F       | tK(CUU)F       | tK(CUU)F       | tK(CUU)F  |
| tK(CUU)G1      | tK(CUU)G1      | tK(CUU)G1      | tK(CUU)G1      | tK(CUU)G1 |
| tK(CUU)G2      | tK(CUU)G2      | tK(CUU)G2      | tK(CUU)G2      | tK(CUU)G2 |
| tK(CUU)G3      |                |                |                | tK(CUU)G3 |
|                | tK(CUU)I       | tK(CUU)I       | tK(CUU)I       |           |
| tK(CUU)J       | tK(CUU)J       | tK(CUU)J       | tK(CUU)J       |           |
| tK(CUU)K       |                |                |                | tK(CUU)K  |
| tK(CUU)M       | tK(CUU)M       | tK(CUU)M       | tK(CUU)M       | tK(CUU)M  |
| tK(CUU)P       |                | tK(CUU)P       | tK(CUU)P       | tK(CUU)P  |
| tK(UUU)D       | tK(UUU)D       | tK(UUU)D       | tK(UUU)D       | tK(UUU)D  |
|                |                |                |                | tK(UUU)G1 |
| tK(UUU)G2      | tK(UUU)G2      | tK(UUU)G2      | tK(UUU)G2      | tK(UUU)G2 |
|                |                |                |                | tK(UUU)K  |
| tK(UUU)L       | tK(UUU)L       | tK(UUU)L       | tK(UUU)L       | tK(UUU)L  |
| tK(UUU)O       |                |                | tK(UUU)O       | tK(UUU)O  |
| tK(UUU)P       | tK(UUU)P       | tK(UUU)P       | tK(UUU)P       | tK(UUU)P  |
| tL(CAA)A SUP56 | tL(CAA)A SUP56 | tL(CAA)A SUP56 | tL(CAA)A SUP56 | tL(CAA)A  |

|                 |                 |                 |                 |           |
|-----------------|-----------------|-----------------|-----------------|-----------|
|                 | tL(CAA)C SUP53  | tL(CAA)C SUP53  | tL(CAA)C SUP53  |           |
| tL(CAA)D        | tL(CAA)D        | tL(CAA)D        | tL(CAA)D        |           |
| tL(CAA)G1       | tL(CAA)G1       | tL(CAA)G1       | tL(CAA)G1       | tL(CAA)G1 |
| tL(CAA)G2 SUP54 | tL(CAA)G2 SUP54 | tL(CAA)G2 SUP54 | tL(CAA)G2 SUP54 | tL(CAA)G2 |
| tL(CAA)G3       | tL(CAA)G3       | tL(CAA)G3       | tL(CAA)G3       | tL(CAA)G3 |
| tL(CAA)K        | tL(CAA)K        | tL(CAA)K        | tL(CAA)K        | tL(CAA)K  |
| tL(CAA)L        | tL(CAA)L        | tL(CAA)L        | tL(CAA)L        | tL(CAA)L  |
| tL(CAA)M        | tL(CAA)M        | tL(CAA)M        | tL(CAA)M        | tL(CAA)M  |
| tL(CAA)N        |                 |                 |                 | tL(CAA)N  |
| tL(GAG)G        | tL(GAG)G        | tL(GAG)G        | tL(GAG)G        | tL(GAG)G  |
| tL(UAA)B1       |                 | tL(UAA)B1       |                 | tL(UAA)B1 |
| tL(UAA)B2       | tL(UAA)B2       | tL(UAA)B2       | tL(UAA)B2       | tL(UAA)B2 |
| tL(UAA)D        | tL(UAA)D        | tL(UAA)D        | tL(UAA)D        |           |
| tL(UAA)J SUP51  | tL(UAA)J SUP51  | tL(UAA)J SUP51  | tL(UAA)J SUP51  | tL(UAA)J  |
| tL(UAA)K        | tL(UAA)K        | tL(UAA)K        | tL(UAA)K        | tL(UAA)K  |
|                 | tL(UAA)L        | tL(UAA)L        | tL(UAA)L        | tL(UAA)L  |
| tL(UAA)N        | tL(UAA)N        | tL(UAA)N        | tL(UAA)N        | tL(UAA)N  |
| tL(UAG)J        |                 | tL(UAG)J        |                 | tL(UAG)J  |
| tL(UAG)L1       |                 |                 | tL(UAG)L1       | tL(UAG)L1 |
| tL(UAG)L2       | tL(UAG)L2       | tL(UAG)L2       | tL(UAG)L2       | tL(UAG)L2 |
| tN(GUU)C        | tM(CAU)C        | tM(CAU)C        | tM(CAU)C        | tM(CAU)C  |
|                 |                 |                 |                 | tM(CAU)D  |
|                 |                 |                 |                 | tM(CAU)E  |
|                 |                 |                 |                 | tM(CAU)J1 |
|                 |                 |                 |                 | tM(CAU)J3 |
|                 |                 |                 |                 | tM(CAU)M  |
|                 |                 |                 |                 | tM(CAU)O2 |
|                 |                 |                 |                 | tN(GUU)C  |
| tN(GUU)F        | tN(GUU)F        | tN(GUU)F        | tN(GUU)F        | tN(GUU)F  |
| tN(GUU)G        | tN(GUU)G        | tN(GUU)G        | tN(GUU)G        | tN(GUU)G  |
| tN(GUU)K        | tN(GUU)K        | tN(GUU)K        | tN(GUU)K        | tN(GUU)K  |
| tN(GUU)L        | tN(GUU)L        | tN(GUU)L        | tN(GUU)L        |           |
| tN(GUU)N1       | tN(GUU)N1       | tN(GUU)N1       | tN(GUU)N1       |           |
| tN(GUU)N2       | tN(GUU)N2       | tN(GUU)N2       | tN(GUU)N2       | tN(GUU)N2 |
| tN(GUU)O1       | tN(GUU)O1       | tN(GUU)O1       | tN(GUU)O1       | tN(GUU)O1 |
| tN(GUU)O2       |                 |                 | tN(GUU)O2       | tN(GUU)O2 |
|                 |                 |                 |                 | tN(GUU)P  |
|                 |                 |                 |                 |           |
| tP(AGG)C SUF2   |                 | tP(AGG)C SUF2   |                 | tP(AGG)C  |
| tP(AGG)N SUF10  | tP(AGG)N SUF10  | tP(AGG)N SUF10  | tP(AGG)N SUF10  | tP(AGG)N  |
| tP(UGG)A TRN1   |                 |                 |                 | tP(UGG)A  |
| tP(UGG)F SUF9   | tP(UGG)F SUF9   | tP(UGG)F SUF9   | tP(UGG)F SUF9   | tP(UGG)F  |

|                 |                 |                 |                 |           |
|-----------------|-----------------|-----------------|-----------------|-----------|
| tP(UGG)H SUF8   | tP(UGG)H SUF8   | tP(UGG)H SUF8   | tP(UGG)H SUF8   | tP(UGG)H  |
| tP(UGG)L        | tP(UGG)L        | tP(UGG)L        | tP(UGG)L        | tP(UGG)L  |
| tP(UGG)M SUF7   | tP(UGG)M SUF7   | tP(UGG)M SUF7   | tP(UGG)M SUF7   | tP(UGG)M  |
|                 |                 |                 |                 | tP(UGG)N1 |
| tP(UGG)N2       | tP(UGG)N2       | tP(UGG)N2       | tP(UGG)N2       | tP(UGG)N2 |
| tP(UGG)O1       | tP(UGG)O1       | tP(UGG)O1       | tP(UGG)O1       |           |
| tP(UGG)O2 SUF11 | tP(UGG)O2 SUF11 | tP(UGG)O2 SUF11 | tP(UGG)O2 SUF11 | tP(UGG)O2 |
| tP(UGG)O3       |                 |                 |                 | tP(UGG)O3 |
| tQ(CUG)M CDC65  |                 | tQ(CUG)M CDC65  |                 | tQ(CUG)M  |
| tQ(UUG)B        | tQ(UUG)B        | tQ(UUG)B        | tQ(UUG)B        | tQ(UUG)B  |
| tQ(UUG)C        |                 | tQ(UUG)C        |                 | tQ(UUG)C  |
| tQ(UUG)D1       | tQ(UUG)D1       | tQ(UUG)D1       | tQ(UUG)D1       | tQ(UUG)D1 |
| tQ(UUG)D2       |                 |                 |                 |           |
| tQ(UUG)D3       | tQ(UUG)D3       | tQ(UUG)D3       | tQ(UUG)D3       | tQ(UUG)D3 |
| tQ(UUG)E1       | tQ(UUG)E1       | tQ(UUG)E1       | tQ(UUG)E1       |           |
| tQ(UUG)E2       | tQ(UUG)E2       | tQ(UUG)E2       | tQ(UUG)E2       | tQ(UUG)E2 |
| tQ(UUG)H        | tQ(UUG)H        | tQ(UUG)H        | tQ(UUG)H        | tQ(UUG)H  |
| tQ(UUG)L        | tQ(UUG)L        | tQ(UUG)L        | tQ(UUG)L        | tQ(UUG)L  |
| tR(ACG)D        | tR(ACG)D        | tR(ACG)D        | tR(ACG)D        | tR(ACG)D  |
| tR(ACG)E        | tR(ACG)E        | tR(ACG)E        | tR(ACG)E        |           |
| tR(ACG)J        | tR(ACG)J        | tR(ACG)J        | tR(ACG)J        | tR(ACG)J  |
| tR(ACG)K        | tR(ACG)K        |                 | tR(ACG)K        | tR(ACG)K  |
| tR(ACG)L        |                 | tR(ACG)L        |                 | tR(ACG)L  |
| tR(ACG)O        | tR(ACG)O        | tR(ACG)O        | tR(ACG)O        | tR(ACG)O  |
| tR(CCG)L TRR4   |                 |                 |                 | tR(CCG)L  |
| tR(CCU)J HSX1   |                 |                 |                 | tR(CCU)J  |
| tR(UCU)B        |                 |                 |                 |           |
| tR(UCU)D        |                 |                 |                 |           |
| tR(UCU)E        |                 |                 |                 | tR(UCU)E  |
| tR(UCU)G1       |                 |                 |                 | tR(UCU)G1 |
| tR(UCU)G2       | tR(UCU)G2       | tR(UCU)G2       | tR(UCU)G2       |           |
| tR(UCU)G3       | tR(UCU)G3       | tR(UCU)G3       | tR(UCU)G3       |           |
| tR(UCU)J1       | tR(UCU)J1       | tR(UCU)J1       | tR(UCU)J1       |           |
| tR(UCU)J2       | tR(UCU)J2       | tR(UCU)J2       | tR(UCU)J2       |           |
| tR(UCU)K        | tR(UCU)K        | tR(UCU)K        | tR(UCU)K        | tR(UCU)K  |
| tR(UCU)M1       | tR(UCU)M1       | tR(UCU)M1       | tR(UCU)M1       | tR(UCU)M1 |
| tR(UCU)M2       | tR(UCU)M2       | tR(UCU)M2       | tR(UCU)M2       | tR(UCU)M2 |
|                 |                 | tS(AGA)A        |                 | tS(AGA)A  |
| tS(AGA)B        | tS(AGA)B        | tS(AGA)B        | tS(AGA)B        | tS(AGA)B  |
| tS(AGA)D1       | tS(AGA)D1       | tS(AGA)D1       | tS(AGA)D1       | tS(AGA)D1 |
| tS(AGA)D2       |                 | tS(AGA)D2       | tS(AGA)D2       | tS(AGA)D2 |
| tS(AGA)D3       | tS(AGA)D3       | tS(AGA)D3       | tS(AGA)D3       | tS(AGA)D3 |

|                |                |                |                |           |
|----------------|----------------|----------------|----------------|-----------|
| tS(AGA)E       |                |                |                |           |
| tS(AGA)G       | tS(AGA)G       | tS(AGA)G       | tS(AGA)G       | tS(AGA)G  |
| tS(AGA)H       | tS(AGA)H       | tS(AGA)H       | tS(AGA)H       | tS(AGA)H  |
| tS(AGA)J       | tS(AGA)J       | tS(AGA)J       | tS(AGA)J       | tS(AGA)J  |
| tS(AGA)L       |                |                |                |           |
| tS(AGA)M       | tS(AGA)M       | tS(AGA)M       | tS(AGA)M       | tS(AGA)M  |
| tS(CGA)C SUP61 |                |                |                | tS(CGA)C  |
| tS(GCU)F       |                |                |                | tS(GCU)F  |
| tS(GCU)L       | tS(GCU)L       | tS(GCU)L       | tS(GCU)L       | tS(GCU)L  |
| tS(GCU)O       | tS(GCU)O       | tS(GCU)O       | tS(GCU)O       | tS(GCU)O  |
|                |                |                |                | tS(UGA)E  |
| tS(UGA)I SUP17 | tS(UGA)I SUP17 | tS(UGA)I SUP17 | tS(UGA)I SUP17 | tS(UGA)I  |
| tS(UGA)P SUP16 | tS(UGA)P SUP16 | tS(UGA)P SUP16 | tS(UGA)P SUP16 | tS(UGA)P  |
| tT(AGU)B       | tT(AGU)B       | tT(AGU)B       | tT(AGU)B       | tT(AGU)B  |
| tT(AGU)C       | tT(AGU)C       | tT(AGU)C       | tT(AGU)C       | tT(AGU)C  |
| tT(AGU)D       |                |                |                | tT(AGU)D  |
| tT(AGU)H       | tT(AGU)H       | tT(AGU)H       | tT(AGU)H       | tT(AGU)H  |
| tT(AGU)I1      | tT(AGU)I1      | tT(AGU)I1      | tT(AGU)I1      |           |
| tT(AGU)I2      | tT(AGU)I2      | tT(AGU)I2      | tT(AGU)I2      | tT(AGU)I2 |
| tT(AGU)J       |                |                |                | tT(AGU)J  |
| tT(AGU)N1      | tT(AGU)N1      | tT(AGU)N1      | tT(AGU)N1      | tT(AGU)N1 |
| tT(AGU)N2      | tT(AGU)N2      | tT(AGU)N2      | tT(AGU)N2      | tT(AGU)N2 |
| tT(AGU)O1      | tT(AGU)O1      | tT(AGU)O1      | tT(AGU)O1      |           |
|                | tT(AGU)O2      | tT(AGU)O2      | tT(AGU)O2      | tT(AGU)O2 |
| tT(CGU)K TRT2  | tT(CGU)K TRN1  | tT(CGU)K TRN1  | tT(CGU)K TRN1  | tT(CGU)K  |
| tT(UGU)G1      | tT(UGU)G1      | tT(UGU)G1      | tT(UGU)G1      |           |
| tT(UGU)G2      | tT(UGU)G2      | tT(UGU)G2      | tT(UGU)G2      | tT(UGU)G2 |
| tT(UGU)H       | tT(UGU)H       |                | tT(UGU)H       |           |
| tT(UGU)P       | tT(UGU)P       | tT(UGU)P       | tT(UGU)P       |           |
| tV(AAC)E1      | tV(AAC)E1      | tV(AAC)E1      | tV(AAC)E1      | tV(AAC)E1 |
| tV(AAC)E2      | tV(AAC)E2      | tV(AAC)E2      | tV(AAC)E2      | tV(AAC)E2 |
|                |                |                |                | tV(AAC)G1 |
| tV(AAC)G2      | tV(AAC)G2      | tV(AAC)G2      | tV(AAC)G2      | tV(AAC)G2 |
| tV(AAC)G3      | tV(AAC)G3      | tV(AAC)G3      | tV(AAC)G3      |           |
| tV(AAC)H       |                |                |                |           |
| tV(AAC)J       | tV(AAC)J       | tV(AAC)J       | tV(AAC)J       | tV(AAC)J  |
| tV(AAC)K1      |                |                |                | tV(AAC)K1 |
| tV(AAC)K2      | tV(AAC)K2      | tV(AAC)K2      | tV(AAC)K2      | tV(AAC)K2 |
| tV(AAC)L       |                | tV(AAC)L       |                | tV(AAC)L  |
| tV(AAC)M1      |                | tV(AAC)M1      | tV(AAC)M1      | tV(AAC)M1 |
| tV(AAC)M2      | tV(AAC)M2      | tV(AAC)M2      | tV(AAC)M2      | tV(AAC)M2 |
| tV(AAC)M3      |                | tV(AAC)M3      | tV(AAC)M3      | tV(AAC)M3 |
| tV(AAC)O       | tV(AAC)O       | tV(AAC)O       | tV(AAC)O       | tV(AAC)O  |
| tV(CAC)D       | tV(CAC)D       | tV(CAC)D       | tV(CAC)D       |           |

|                |                |                   |                    |           |
|----------------|----------------|-------------------|--------------------|-----------|
|                | tV(UAC)B       | tV(UAC)B          | tV(UAC)B           | tV(UAC)B  |
| tV(UAC)D       |                |                   |                    | tV(UAC)D  |
| tW(CCA)G1      | tW(CCA)G1      | tW(CCA)G1         | tW(CCA)G1          | tW(CCA)G1 |
| tW(CCA)G2      | tW(CCA)G2      | tW(CCA)G2         | tW(CCA)G2          | tW(CCA)G2 |
| tW(CCA)J       |                | tW(CCA)J          |                    | tW(CCA)J  |
| tW(CCA)K       | tW(CCA)K       | tW(CCA)K          | tW(CCA)K           | tW(CCA)K  |
| tW(CCA)M       | tW(CCA)M       | tW(CCA)M          | tW(CCA)M           | tW(CCA)M  |
| tX(XXX)D       | tX(XXX)D       | tX(XXX)D          | tX(XXX)D           |           |
| tY(GUA)D SUP2  |                | tY(GUA)D SUP2     | tY(GUA)D SUP2      |           |
|                |                |                   | tY(GUA)F1<br>SUP11 |           |
| tY(GUA)F2 SUP6 |                |                   |                    |           |
| tY(GUA)J1 SUP7 | tY(GUA)J1 SUP7 | tY(GUA)J1<br>SUP7 | tY(GUA)J1 SUP7     | tY(GUA)J1 |
| tY(GUA)J2 SUP4 |                |                   |                    | tY(GUA)J2 |
| tY(GUA)M1 SUP5 | tY(GUA)M1 SUP5 | tY(GUA)M1<br>SUP5 | tY(GUA)M1<br>SUP5  | tY(GUA)M1 |
| tY(GUA)M2 SUP8 | tY(GUA)M2 SUP8 | tY(GUA)M2<br>SUP8 | tY(GUA)M2<br>SUP8  | tY(GUA)M2 |
| tY(GUA)O SUP3  | tY(GUA)O SUP3  | tY(GUA)O SUP3     | tY(GUA)O SUP3      |           |
