# Supplementary material for: Large-scale profiling of noncoding RNA function in yeast
Source: PubMed Central journal article supplement (PMC5864082; doi:10.1371/journal.pgen.1007253), 2018-03-12
Supplement: pgen.1007253.s017.pdf [file pgen.1007253.s017.pdf]

**S17 Table. Strains**

| Source          | Strain | Genotype                                                                                                                                                                                                                                                                                                                                                                         | Use                                                              |
|-----------------|--------|----------------------------------------------------------------------------------------------------------------------------------------------------------------------------------------------------------------------------------------------------------------------------------------------------------------------------------------------------------------------------------|------------------------------------------------------------------|
| ATCC<br>4040002 | BY4741 | <i>MAT<math>\alpha</math></i> ; <i>his3<math>\Delta</math>1</i> ; <i>leu2<math>\Delta</math>0</i> ; <i>met15<math>\Delta</math>0</i> ;<br><i>ura3<math>\Delta</math>0</i>                                                                                                                                                                                                        | Background strain for ncRNA deletions<br>(Brachmann et al. 1998) |
| ATCC<br>4040004 | BY4742 | <i>MAT<math>\alpha</math></i> ; <i>his3<math>\Delta</math>1</i> ; <i>leu2<math>\Delta</math>0</i> ; <i>lys2<math>\Delta</math>0</i> ;<br><i>ura3<math>\Delta</math>0</i>                                                                                                                                                                                                         | Background strain for ncRNA deletions<br>(Brachmann et al. 1998) |
| ATCC<br>4040005 | BY4743 | <i>MAT<math>\alpha</math></i> / <i>MAT<math>\alpha</math></i> ; <i>his3<math>\Delta</math>1</i> / <i>his3<math>\Delta</math>1</i> ; <i>leu2<math>\Delta</math>0</i><br><i>/leu2<math>\Delta</math>0</i> ; <i>met15<math>\Delta</math>0</i> / <i>MET15</i> ;<br><i>LYS2</i> / <i>lys2<math>\Delta</math>0</i> ; <i>ura3<math>\Delta</math>0</i> / <i>ura3<math>\Delta</math>0</i> | Background strain for ncRNA deletions<br>(Brachmann et al. 1998) |
| C. Stirling     | TR2    | <i>MAT<math>\alpha</math></i> ; <i>trp1-289</i> ; <i>his3-600</i> ; <i>ura3-52</i> ;<br><i>lys2-801a</i> ; <i>ade2-101</i>                                                                                                                                                                                                                                                       | Mating type testing<br>(Parker et al. 1988)                      |
| C. Stirling     | TR3    | <i>MAT<math>\alpha</math></i> ; <i>trp1-289</i> ; <i>his3-600</i> ; <i>ura3-52</i> ;<br><i>lys2-801a</i> ; <i>ade2-101</i>                                                                                                                                                                                                                                                       | Mating type testing<br>(Parker et al. 1988)                      |
| EUROSCARF       | CML476 | <i>MAT<math>\alpha</math></i> ; <i>ura3-52</i> ; <i>leu2<math>\Delta</math>1</i> ; <i>his3<math>\Delta</math>200</i> ;<br><i>GAL2</i> ; <i>CMVp(tetR'-SSN6)::LEU2</i> ;<br><i>trp1::tTA</i>                                                                                                                                                                                      | Regulated expression<br>(Yen et al. 2003)                        |

**References**

- Brachmann CB, Davies A, Cost GJ, Caputo E, Li J, Hieter P, Boeke JD. 1998. Designer deletion strains derived from *Saccharomyces cerevisiae* S288C: a useful set of strains and plasmids for PCR-mediated gene disruption and other applications. *Yeast* **14**: 115-132.
- Parker R, Simmons T, Shuster EO, Siliciano PG, Guthrie C. 1988. Genetic analysis of small nuclear RNAs in *Saccharomyces cerevisiae*: viable sextuple mutant. *Mol Cell Biol* **8**: 3150-3159.
- Yen K, Gitsham P, Wishart J, Oliver SG, Zhang N. 2003. An improved tetO promoter replacement system for regulating the expression of yeast genes. *Yeast* **20**: 1255-1262.
