# Supplementary material for: Large-scale profiling of noncoding RNA function in yeast
Source: PubMed Central journal article supplement (PMC5864082; doi:10.1371/journal.pgen.1007253), 2018-03-12
Supplement: pgen.1007253.s018.pdf [file pgen.1007253.s018.pdf]

**S18 Table. Primer list**

| <b>Primer Name</b> | <b>Sequence (5' to 3')</b>                                           |
|--------------------|----------------------------------------------------------------------|
| SEC4F-Bam          | CGGGATCCTAGACATATATGTACATCTAAAC                                      |
| SEC4B-Eco          | AATAAAAAGTGCTGAATATTTAAAAG                                           |
| RUF20F-Bam         | CGGGATCCTAGACTTTTTCAAGTTCCTTATCC                                     |
| RUF20B-Xba         | GCTCTAGACGCTGGTCAAGAACGTTTCCGGAC                                     |
| SEC4F-T7           | GCTAATACGACTCACTATAGGGTCAACAGCAATTTGATT                              |
| SEC4B-prob         | ATGTCAGGCTTGAGAACTGTTTCTG                                            |
| RUF20F-T7          | GCTAATACGACTCACTATAGGGCATACTTCTACTGTTGTTCTCTGC                       |
| RUF20B-prob        | ACGTGGGTTTTTTTTTTCGAATTGAGTGATTATG                                   |
| RUF20_P1           | CTTCCTCAGGAATTTTTTCAAGCCCTCATAATTAATAAGAACCGTACGCTGCAGGTCGACGG       |
| RUF20_P2           | CCTGTATGGTGCATAATCACTCAATTCGAAAAAAAAACCCACGTATAGGCCACTAGTGGA<br>TCTG |
| SEC4F              | GCTTCATCCGGTAATGGAAAGAGC                                             |
| SEC4B1             | GAACCTCGTTTTCTGTTGCAC                                                |
| SEC4B2             | GCCTGATGAAAATACCTTCCAGAGC                                            |
| SEC4B3             | GCTGAAAAAGTTAGTTAGTGTGAGAAGTTTG                                      |
| SEC2B4             | GTGACATCTAATATGACTAAT                                                |
| SEC4B5             | ATAACCTGCGAATATTGAG                                                  |
| SEC4B6             | CCAGTTCACGATTAATTCTC                                                 |
| SEC4B7             | CCGCTCCCACTATTGATGC                                                  |
| SEC4B8             | CGTTCTTAGCACTGGACTCGA                                                |
| TUB2F              | CATATCTCGACAGGTCAGTGTG                                               |
| TUB2B1             | CCCTGATCTGCGTAATATTGC                                                |
| TUB2B2             | GCTCCAAGTGCTTCAATCCTAG                                               |
| TUB2B3             | CATTGTATGGTTCGACAACGG                                                |
| RUF20FQ            | GCGCAAGTAGTTGAATAGTGG                                                |
| RUF20BQ            | CCCTGGGAATTCTTATCCAAG                                                |
| SEC4FQ             | GTTCTCTCGTCTGTACATC                                                  |
| SEC4BQ             | GGTAAAGCTGCAACTTTGGG                                                 |
| HAP4F              | ATATTCCATTGGCGCCTGTA                                                 |
| HAP4R              | TTGGTGTGTTGGCAGGTAG                                                  |
| KTI12F             | TATTGGCGGGGTAAGTAACG                                                 |
| KTI12R             | AAGCGGACCGATCCTATCTT                                                 |
| DPS1F              | TGGTCCAGTGTGTTTGAGG                                                  |
| DPS1R              | TCTTCGAAAGCCATTTCCAT                                                 |
| PRP3F              | GCCTCGTTGATCTTTTCAGG                                                 |
| PRP3R              | GCCGAAGAAAAGCTAGCAGA                                                 |
| EMP46F             | GCTGAAGCAAGGAAATGAGG                                                 |
| EMP46R             | CGCTCTCTCCCACTTATCG                                                  |
| GAL2F              | GTAGAAGACGCCAAGCGTTC                                                 |
| GAL2R              | CCAGCCAGTTTTTCAGCTTC                                                 |
| RPL3F              | GACTGGGCTCGTGAACATTT                                                 |
| RPL3R              | AACACCTTCGAAACCGTGAC                                                 |
| SUT690F            | CGACAGTAAAAGCAGCAAAACA                                               |
| SUT690R            | AGTTCCCCTGGTCCGTAAAC                                                 |
| ACT1F              | CGGTGATGGTGTTACTCACG                                                 |
| ACT1B              | GGCCAAATCGATTCTCAAAA                                                 |

|                         |                                                                        |
|-------------------------|------------------------------------------------------------------------|
| Gal1.for                | GGCCCCCCTCGAGGCGGATTAGAAGCCGCCGAG                                      |
| Gal1.rev                | ATATCAAGCTTATCGATACCGCTCCTTGACGTTAAAGTATAGAGGTATATTAACAATTTTT<br>G     |
| Cyc1.for                | GCCCGGGCAAATTAAGCCTTCGAGCGT                                            |
| Cyc1.rev                | ACTAGTGGATCCTCATGTAATTAGTTATGTCACGCTTACATTCACG                         |
| SUT527.for              | AAGGAGCGGTATCGATAAAAAGTTGGCAAGAAGAAAGAAATGACTCT                        |
| SUT527.rev              | CTGCAGGAATTCGATATCATTTTTCTCAATATTCGCAGGTTATTTTTCTTTATATATATACA<br>TTGT |
| SUT075.for              | AAGGAGCGGTATCGATAAACAATTCACAGTGCCTGTCCAG                               |
| SUT075.rev              | CTGCAGGAATTCGATATCAGTCATCACAGGTGGTGCTCC                                |
| SUT367.for              | AAGGAGCGGTATCGATACGCTCGTATCAGCCACTTACG                                 |
| SUT367.rev              | CTGCAGGAATTCGATATCATTTTCATGGACGATGATCACTGAAAAAAAAAAAAAAAAAAAAAT        |
| SUT259.for              | AAGGAGCGGTATCGATAAATGGGTACGCTGATCTATATTCGAAAGG                         |
| SUT259.rev              | CTGCAGGAATTCGATATCATGGGAAGGGCTTAACTAATCTCGG                            |
| SUT691.for              | AAGGAGCGGTATCGATAAAGGGCTTAACTAATCTCGGTTCCG                             |
| SUT691.rev              | CTGCAGGAATTCGATATCAGCAATTTCTTTTTCTATTAGTAGCTAAAAATGGGTAC               |
| SUT527<br>antisense.for | AAGGAGCGGTATCGATATCTTAGCAGGTTTGTCCACTAATCTACG                          |
| SUT527<br>antisense.rev | CTGCAGGAATTCGATATCAAATAACAGGCAGACGTGAGAGAAGAA                          |
| SUT075<br>antisense.for | AAGGAGCGGTATCGATAGTCATCACAGGTGGTGCTCC                                  |
| SUT075<br>antisense.rev | CTGCAGGAATTCGATATCAAACAATTCACAGTGCCTGTCCAG                             |
| SUT367<br>antisense.for | AAGGAGCGGTATCGATATTTTCATGGACGATGATCACTGAAAAAAAAAAAAAAAAAAAAAT          |
| SUT367<br>antisense.rev | CTGCAGGAATTCGATATCACGCTCGTATCAGCCACTTACG                               |
| SUT259<br>antisense.for | AAGGAGCGGTATCGATATGGGAAGGGCTTAACTAATCTCGG                              |
| SUT259<br>antisense.rev | CTGCAGGAATTCGATATCAAATGGGTACGCTGATCTATATTCGAAAGG                       |
| SUT691<br>antisense.for | AAGGAGCGGTATCGATAGCAATTTCTTTTTCTATTAGTAGCTAAAAATGGGTAC                 |
| SUT691<br>antisense.rev | CTGCAGGAATTCGATATCAAAGGGCTTAACTAATCTCGGTTCCG                           |
